# Supplementary material for: Ductile effect of PGA/PCL Blending Plastics using Novel Ionic Chain Extender with Non-Covalent Bonds
Source: Preprints.org preprint supplement (doi:10.20944/preprints202306.0558.v1), 2023-06-07
Supplement: Supplementary file 2 [file supplementary]

**Supporting information**

**
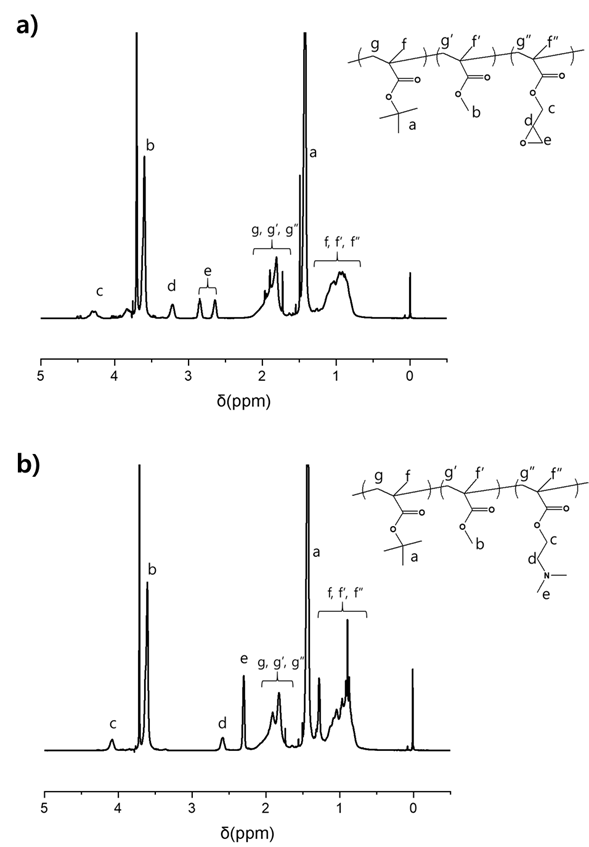
**

Figure S. Chemical structure analysis of synthesized covalent a) and non-covalent b) chain extenders.

**Table S1. Melt flow index (MFI) results of PGA/PCL blending plastics according to blending ratio and introducing with covalent or non-covalent chain extenders.**

| **Sample name** | **PGA**  **(g)** | **PCL**  **(g)** | **G-CE*a (g)** | **D-CE*b (g)** | **ADR-4368*c (g)** | **Time (min)** | **MFI (g/10min)** |
| --- | --- | --- | --- | --- | --- | --- | --- |
| PGA_0 | 150 | - | - | - | - | 0 | 24.50 |
| PGA_4 | 150 | - | - | - | - | 4 | 25.92 |
| PGA | 150 | - | - | - | - | 6 | 26.94 |
| PGA_8 | 150 | - | - | - | - | 8 | 30.58 |
| PGA_10 | 150 | - | - | - | - | 10 | 31.45 |
| PGA_12 | 150 | - | - | - | - | 12 | 32.86 |
| 10 | 135 | 15 | - | - | - | 6 | 37.02 |
| 10G | 135 | 15 | 0.75 | - | - | 6 | 15.56 |
| 10D | 135 | 15 | - | 0.3 | - | 6 | 22.66 |
| 10GD | 135 | 15 | 0.75 | 0.3 | - | 6 | 21.1 |
| 10J | 135 | 15 | - | - | 1.5 | 6 | 38.92 |
| 30 | 105 | 45 | - | - | - | 6 | 63.42 |
| 30G | 105 | 45 | 0.75 | - | - | 6 | 18.25 |
| 30D | 105 | 45 | - | 0.3 | - | 6 | 24.69 |
| 30GD | 105 | 45 | 0.75 | 0.3 | - | 6 | 24.75 |
| 50 | 75 | 75 | - | - | - | 6 | 44.07 |
| 50G | 75 | 75 | 0.75 | - | - | 6 | 17.91 |
| 50D | 75 | 75 | - | 0.3 | - | 6 | 32.36 |
| 50GD | 75 | 75 | 0.75 | 0.3 | - | 6 | 27.76 |
| 10G_0.2 | 135 | 15 | 0.3 | - | - | 6 | 18.39 |
| 10G_0.5 (10G) | 135 | 15 | 0.75 | - | - | 6 | 15.56 |
| 10G_1.0 | 135 | 15 | 1.5 | - | - | 6 | 16.28 |
| 10D_0.2 | 135 | 15 | - | 0.3 | - | 6 | 22.66 |
| 10D_0.5 (10D) | 135 | 15 | - | 0.75 | - | 6 | 44.66 |
| 10D_1.0 | 135 | 15 | - | 1.5 | - | 6 | 52.82 |

*a ; Ionic chain extender (D-CE)

*b ; Covalent chain extender (G-CE)

*c ; Joncryl® chain extender purchased from BASF Co. Ltd

**Table S2. Differential scanning calorimetry (DSC) of PGA and PGA/PCL blending plastics with or without chain extenders.**

| **Sample name** | **Tc1 at PCL**  **(℃)** | **area**  **(mJ)** | **Tc2 at PGA**  **(℃)** | **area**  **(mJ)** | **Tm1 at PGA**  **(℃)** | **Tm2 at PGA**  **(℃)** |
| --- | --- | --- | --- | --- | --- | --- |
| PGA | - | - | 193.46 | 536.24 | 210.76 | 221.67 |
| 10 | 13.75 | 16.53 | 193.13 | 281.21 | 214.83 | 222.24 |
| 10G | 14.71 | 32.34 | 190.91 | 389.86 | 215.24 | 221.32 |
| 10D | 11.60 | 19.08 | 192.39 | 283.32 | 214.01 | 221.33 |
| 10GD | 11.37 | 10.06 | 193.05 | 172.94 | 215.61 | 222.60 |

**Table S3. Mechanical properties of PGA/PCL blending plastics according to blending ratio and introducing with or without chain extenders.**

| **Sample name** | **Tensile strength (kgf/mm2)** | | **Elongation (%)** |
| --- | --- | --- | --- |
| PGA | | 8.22 | 4.80 |
| 10 | | 11.60 | 7.20 |
| 30 | | 5.67 | 6.20 |
| 50 | | 3.45 | 5.15 |
| 10G | | 8.99 | 18.45 |
| 30G | | 4.65 | 11.15 |
| 50G | | 2.15 | 7.20 |
| 10D | | 9.31 | 26.60 |
| 30D | | 5.69 | 13.60 |
| 50D | | 2.41 | 11.20 |
| 10J | | 9.03 | 14.35 |
